# Supplementary material for: Exome Sequencing Identifies Genetic Variants Associated with Extreme Manifestations of the Cardiovascular Phenotype in Marfan Syndrome
Source: MDPI journal article supplement (doi:10.3390/genes13061027), 2022-06-08
Supplement: s1 [file s1]

## **Supplemental Material**

**Exome sequencing identifies genetic variants associated with extreme manifestations of the cardiovascular phenotype in Marfan Syndrome**

**Yanireth Jimenez <sup>1</sup>, Cesar Paulsen <sup>2</sup>, Eduardo Turner <sup>2</sup>, Sebastian Iturra <sup>2</sup>, Oscar Cuevas <sup>2,3</sup>, Guillermo Lay-son <sup>4</sup>, Gabriela Repetto <sup>5</sup>, Marcelo Rojas <sup>1</sup> and Juan Calderon <sup>6,7,\*</sup>**

| Familial or sporadic patients | Patient ID code | Mild Phenotype                                                   |                                                                             |                                                       | Severe Phenotype                 |                                              |                                                            | Classification | Sex (M/F) | Age of onset of cardiovascular surgery (years) |
|-------------------------------|-----------------|------------------------------------------------------------------|-----------------------------------------------------------------------------|-------------------------------------------------------|----------------------------------|----------------------------------------------|------------------------------------------------------------|----------------|-----------|------------------------------------------------|
|                               |                 | AoR* diameter with Z ≤2 in adults, no major cardiovascular event | AoR diameter with Z ≤1 in pediatric patients, no major cardiovascular event | Age at first major cardiovascular event ≥30 years old | AoR diameter with Z ≥3 in adults | AoR diameter with Z ≥2 in pediatric patients | One or more major cardiovascular event before 18 years old |                |           |                                                |
| Family 1                      | CAS-01-001      |                                                                  |                                                                             |                                                       | X                                |                                              |                                                            | Severe         | F         | -                                              |
|                               | CAS-01-002      | X                                                                |                                                                             |                                                       |                                  |                                              |                                                            | Mild           | M         | -                                              |
|                               | CAS-01-003      | X                                                                |                                                                             |                                                       |                                  |                                              |                                                            | Mild           | M         | -                                              |
|                               | CAS-01-004      |                                                                  |                                                                             |                                                       |                                  |                                              |                                                            | Unaffected     | F         | -                                              |
|                               | CAS-01-005      |                                                                  |                                                                             |                                                       | X                                |                                              |                                                            | Severe         | M         | -                                              |
|                               | CAS-01-006      |                                                                  |                                                                             |                                                       |                                  |                                              |                                                            | Unaffected     | M         | -                                              |
|                               | CAS-01-007      | X                                                                |                                                                             |                                                       |                                  |                                              |                                                            | Mild           | F         | -                                              |
| Family 2                      | CAS-01-019      |                                                                  |                                                                             | X                                                     |                                  |                                              |                                                            | Mild           | F         | 31                                             |
|                               | CAS-01-020      |                                                                  | X                                                                           |                                                       |                                  |                                              |                                                            | Mild           | F         | -                                              |
|                               | CAS-01-021      |                                                                  | X                                                                           |                                                       |                                  |                                              |                                                            | Mild           | F         | -                                              |

|                    |            |   |   |   |   |   |   |            |   |    |
|--------------------|------------|---|---|---|---|---|---|------------|---|----|
|                    | CAS-01-022 |   | X |   |   |   |   | Mild       | F | -  |
|                    | CAS-01-023 |   |   | X |   |   |   | Mild       | F | 32 |
| Family 3           | CAS-01-024 |   |   | X |   |   |   | Mild       | F | 37 |
|                    | CAS-01-025 |   |   |   |   |   |   | Unaffected | M | -  |
|                    | CAS-01-026 |   |   |   |   | X |   | Severe     | M | -  |
| Family 4           | CAS-01-035 | X |   |   |   |   |   | Mild       | M | -  |
|                    | CAS-01-036 |   | X |   |   |   |   | Mild       | M | -  |
| Family 5           | CAS-01-046 |   |   | X |   |   |   | Mild       | M | 30 |
|                    | CAS-01-048 |   | X |   |   |   |   | Mild       | M | -  |
|                    | CAS-01-045 |   |   |   |   |   | X | Severe     | M | 16 |
| Non-familial cases | CAS-01-016 |   |   |   |   | X |   | Severe     | M | -  |
| Non-familial cases | CAS-01-027 |   |   |   | X |   |   | Severe     | M | 27 |
| Non-familial cases | CAS-01-031 |   |   |   |   |   | X | Severe     | M | 12 |
| Non-familial cases | CAS-01-043 |   |   |   |   |   | X | Severe     | M | 16 |

|                    |            |   |  |  |  |  |  |      |   |   |
|--------------------|------------|---|--|--|--|--|--|------|---|---|
| Non-familial cases | CAS-01-044 | X |  |  |  |  |  | Mild | F | - |
|--------------------|------------|---|--|--|--|--|--|------|---|---|

**Table S1. Criteria for the stratification and classification of patients with MFS according to the severity of the aortic phenotype.** Mild and severe phenotypes were defined based on deviation from the criteria published on the Revised Ghent Nosology for MFS (patients who are at the extremes of the curve)

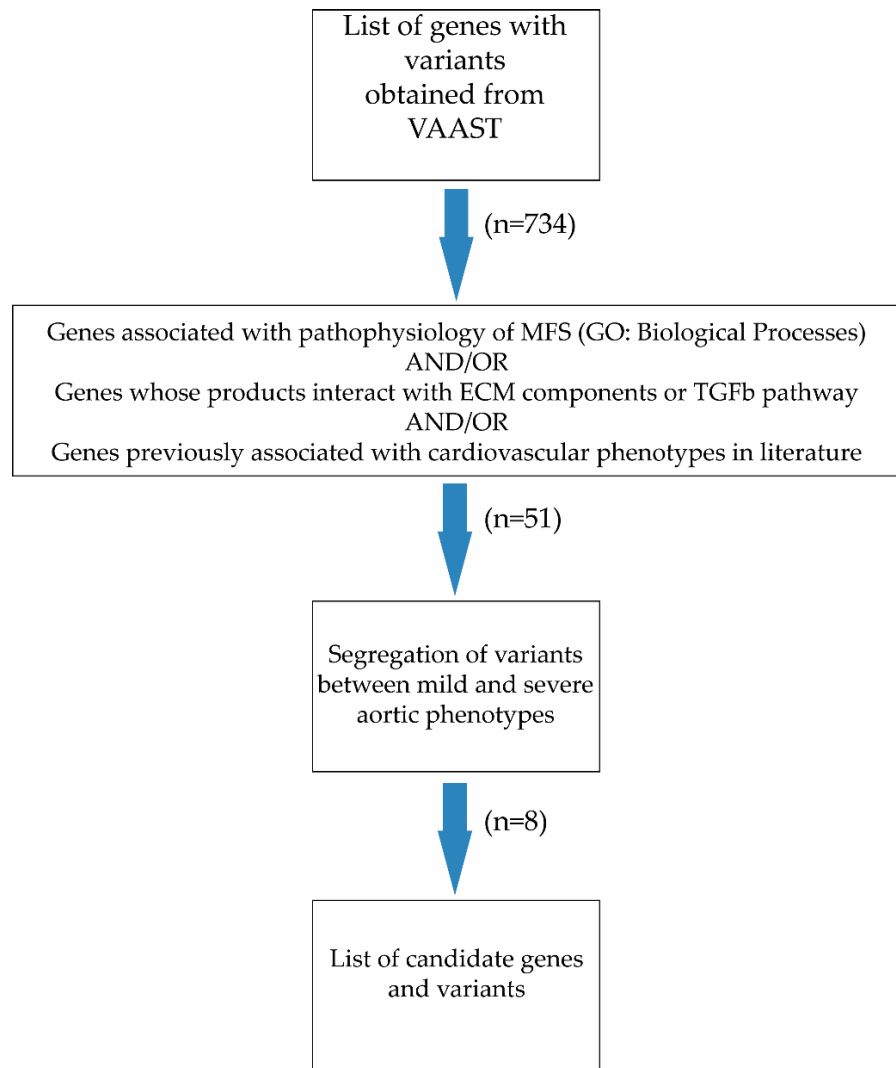

**Figure S1. Flowchart of genes and variant prioritization to select candidate modifiers of the aortic phenotype in MFS**

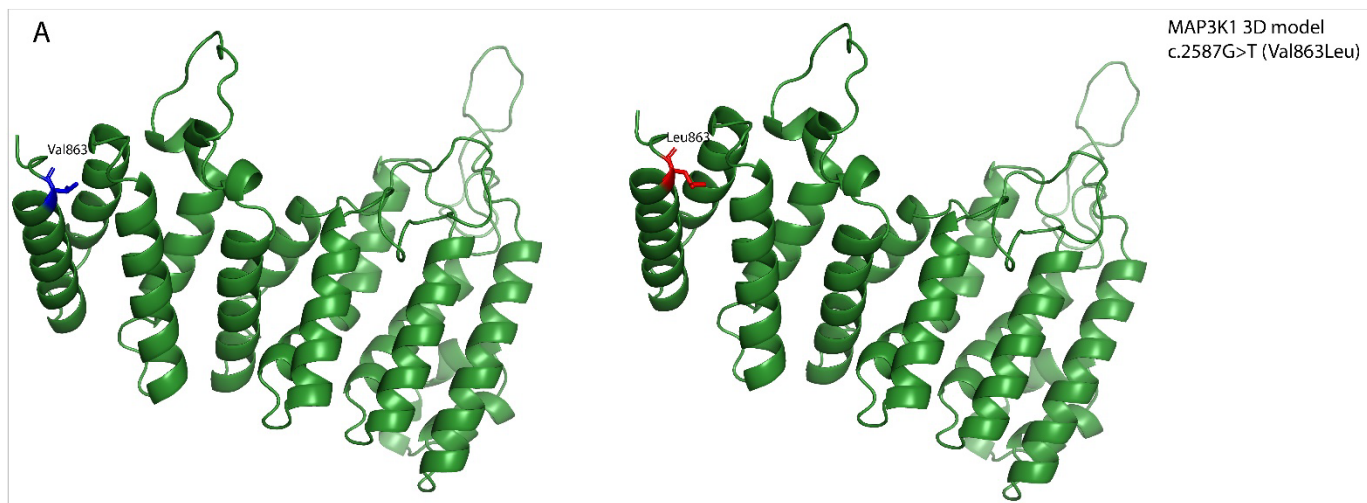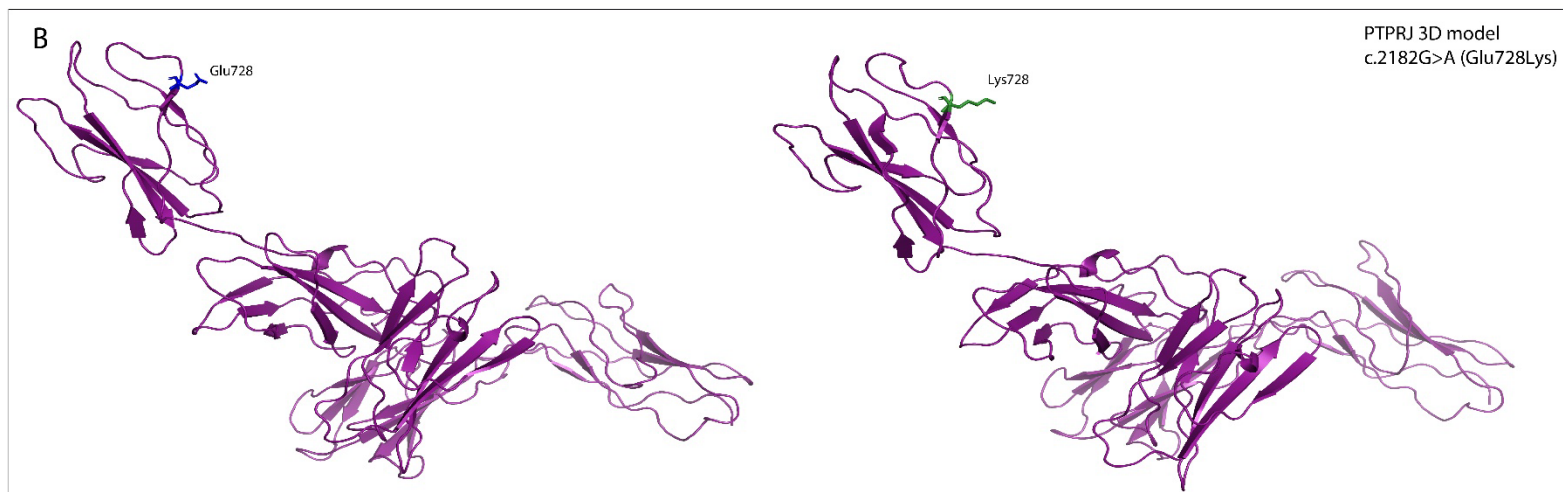

C

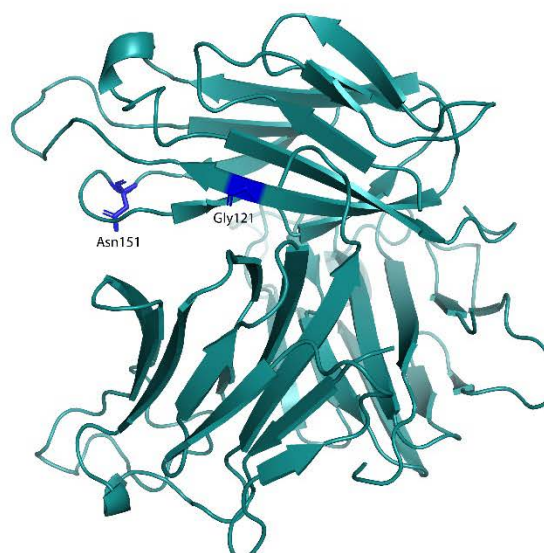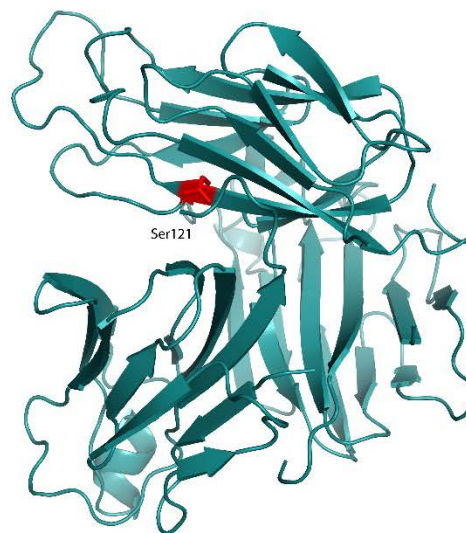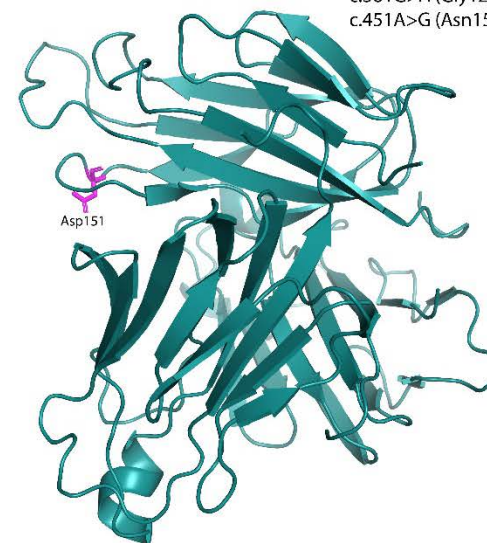

TNFSF18 3D model  
c.361G>A (Gly121Ser)  
c.451A>G (Asn151Asp)

D

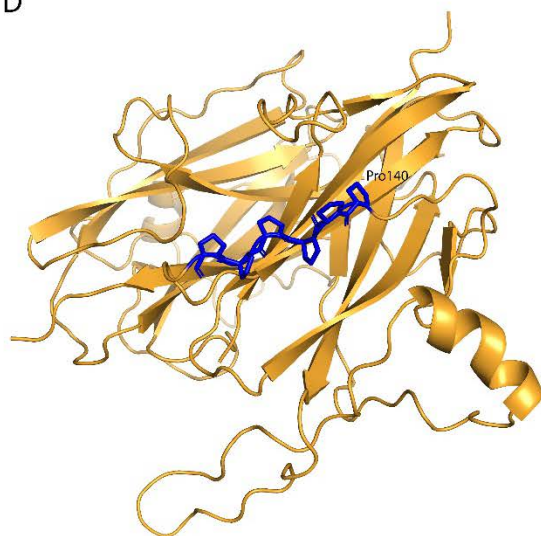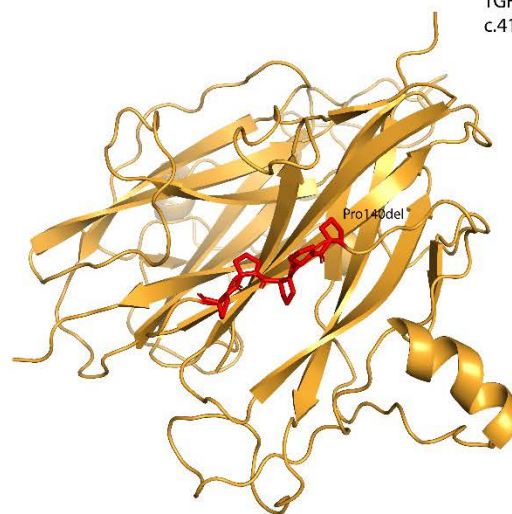

TGFBR3L 3D model  
c.418\_420del (Pro140del)

**FigureS2. 3D structural modeling of MAP3K1, PRPRJ, TNFSF18 AND TGFBR3L proteins to show the predicted effect of the variants identified in MFS patients with extreme presentations of the aortic phenotype. Structures of both reference and alternative residues are displayed.**

**(A)** Left panel shows the reference structure of MAP3K1. Right panel shows that variant c.2587G>T causes a change of the amino acid valine for the amino acid leucine at position 863 (Val863Leu). **(B)** Left panel shows the reference structure of PTPRJ. Right panel shows that variant c.2182G>A produces a change of Glu to Lys at position 728 (Glu728Lys). **(C)** Left panel shows the reference structure of TNFSF18. Middle panel shows that variant c.361G>A produces a change of Gly to Ser at position 121 (Gly121Ser). Right panel shows that variant c.451A>G produces a change of Asn to Asp at position 151 (Asn151Asp). **(D)** Left panel shows the reference structure of TGFBR3L. Right panel shows that variant c418\_420del causes a loss of the amino acid proline at position 140 (Pro140del).
